# Supplementary material for: High-Throughput Imaging Assay for Drug Screening of 3D Prostate Cancer Organoids
Source: PubMed Central journal article supplement — SLAS Discov. 2021 Jun 11;26(9):1107–24. doi: 10.1177/24725552211020668 (PMC8458687; doi:10.1177/24725552211020668), 2021-06-11
Supplement: sj-pdf-1-jbx-10.1177_24725552211020668.pdf [file sj-pdf-1-jbx-10.1177_24725552211020668.pdf]

## **Supplemental Figures**

### **High-throughput imaging assay for drug screening of 3D prostate cancer organoids**

#### **Correspondence:**

Dr Mitchell G Lawrence  
Monash Biomedicine Discovery Institute Cancer Program, Department of Anatomy and Developmental Biology  
Monash University, Level 3, Building 76, 19 Innovation Walk, Clayton, VIC, 3800, Australia  
Phone: +61 3 9902 9286  
Email: mitchell.lawrence@monash.edu

A/Prof Kaylene Simpson  
Victorian Centre for Functional Genomics, Peter MacCallum Cancer Centre  
Level 11, Cluster 6, Victorian Comprehensive Cancer Centre, 305 Grattan St  
Melbourne, VIC, 3000, Australia  
Phone: +61 3 85597509  
Email: kaylene.simpson@petermac.org



**Supplementary Figure 1: Representative plate layout of a high throughput screening assay.** (A) Plate layout of organoids grown in different concentrations of Matrigel treated with DMSO and dose responses of talazoparib or carboplatin. (B) Plate layout of a 3D compound screen including DMSO, six positive controls and 42 library compounds.

| Imaging feature  | Schematic representation                                                             |
|------------------|--------------------------------------------------------------------------------------|
| Area             |     |
| MeanRadius       |     |
| Eccentricity     |    |
| FormFactor       |    |
| MeanIntensity    |    |
| Texture          |   |
| Texture_Variance |  |

**Supplementary Figure 2: Schematic representation of imaging features used for organoid analyses.** Imaging features include area, mean radius, eccentricity, form factor, mean intensity, texture and texture variance. A detailed description is also provided in Table 1.

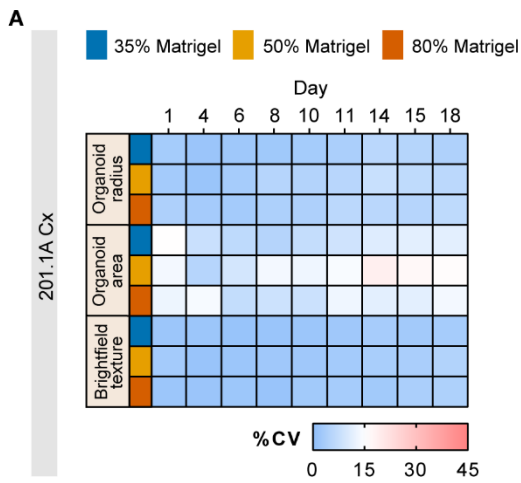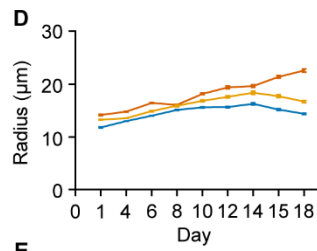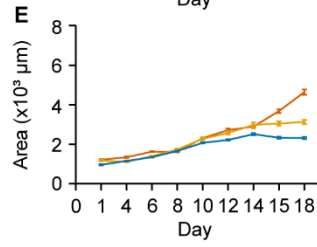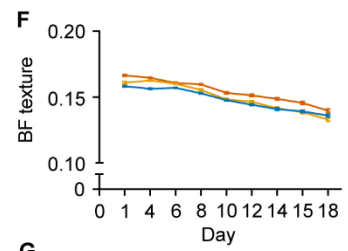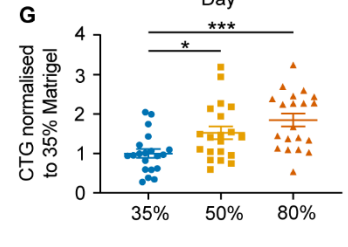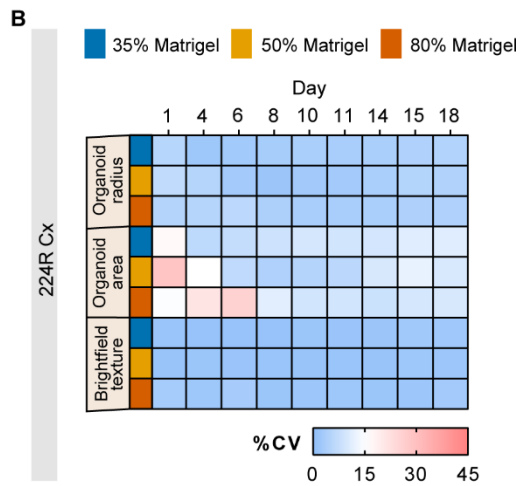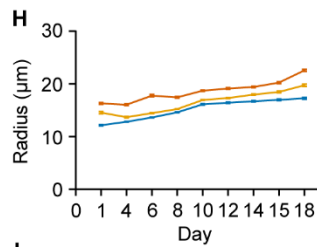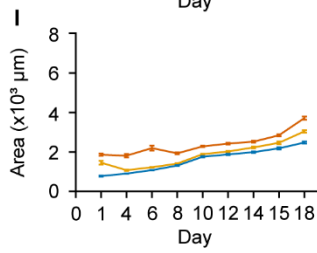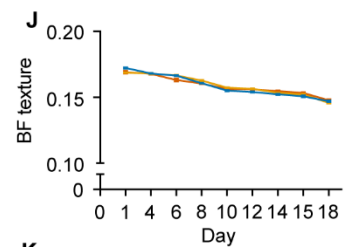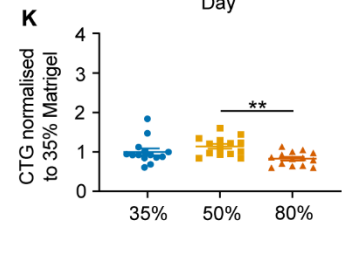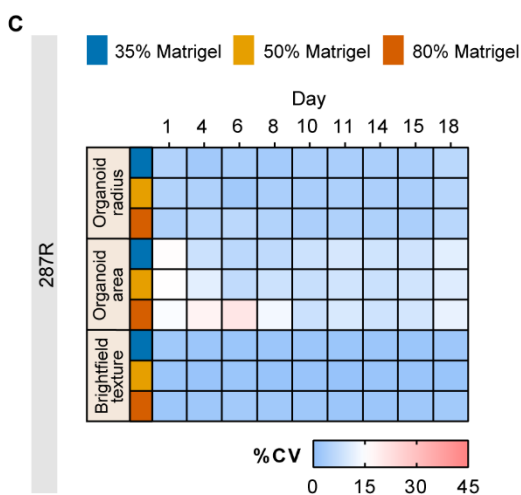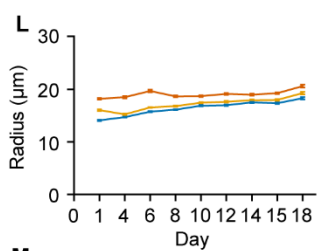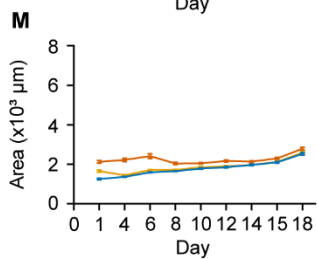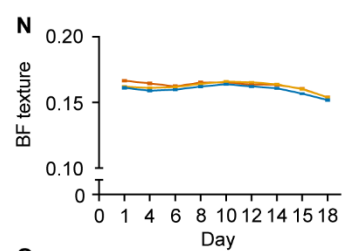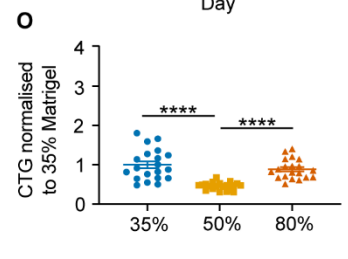

**Supplementary Figure 3: Comparison of organoid growth from diverse phenotypes of prostate cancer in different concentrations of Matrigel. (A-C)** Heatmaps of percent coefficient of variation for **(A)** 201.1A-Cx, **(B)** 224R-Cx, and **(C)** 287R organoids across 18 days for organoid radius, area, and brightfield texture in 35% (blue), 50% (yellow) and 80% Matrigel (orange). The growth of organoids from 201.1A-Cx **(D-G)**, 224R-Cx **(H-K)**, and 287R **(L-O)** in different concentrations of Matrigel was measured over 18 days ( $n = 15$  wells per tumor). Graphs show changes in organoid radius **(D, H, L)**, area **(E, I, M)**, and brightfield texture **(F, J, N)**. Metabolic activity **(G, K, O)** was measured with CTG and normalized to 35% Matrigel. All data are mean  $\pm$  SEM; \* $P < 0.05$ ; \*\* $P < 0.01$ , \*\*\* $P < 0.001$ , \*\*\*\* $P < 0.0001$ ; one-way ANOVA with post hoc Tukey's test. Abbreviations: CV – coefficient of variation, CTG – CellTiter-Glo.

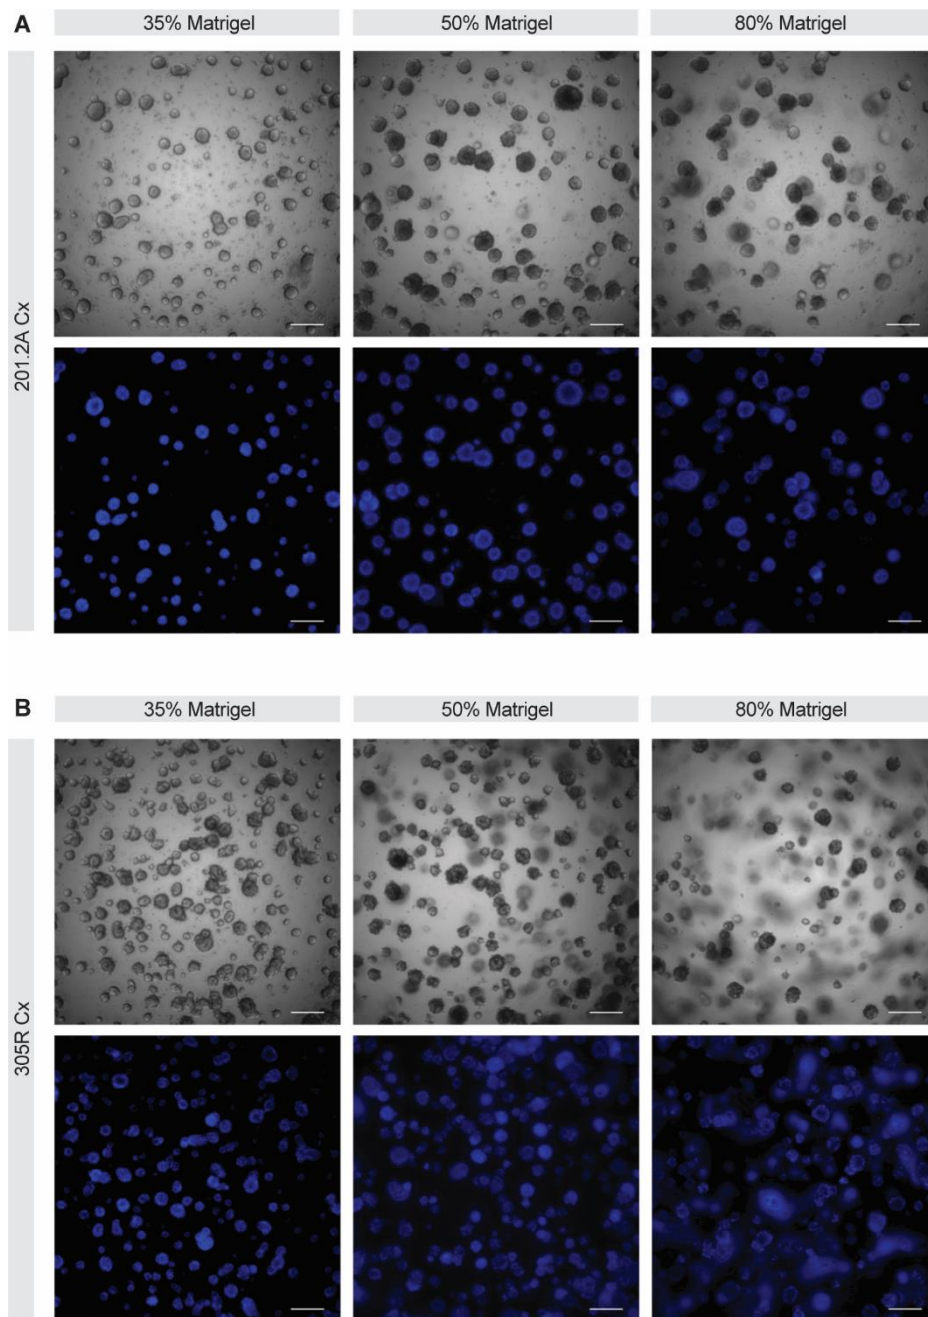

**Supplementary Figure 4: Maximum projections of brightfield and fluorescence microscopy of organoids grown in different concentrations of Matrigel.** Representative images of (A) 201.2-Cx and (B) 305R-Cx organoids grown for 21 days in 35%, 50% or 80% Matrigel. Images are maximum projections from three Z heights for brightfield microscopy and fluorescence microscopy of Hoechst staining. Scale bars = 500  $\mu$ m.

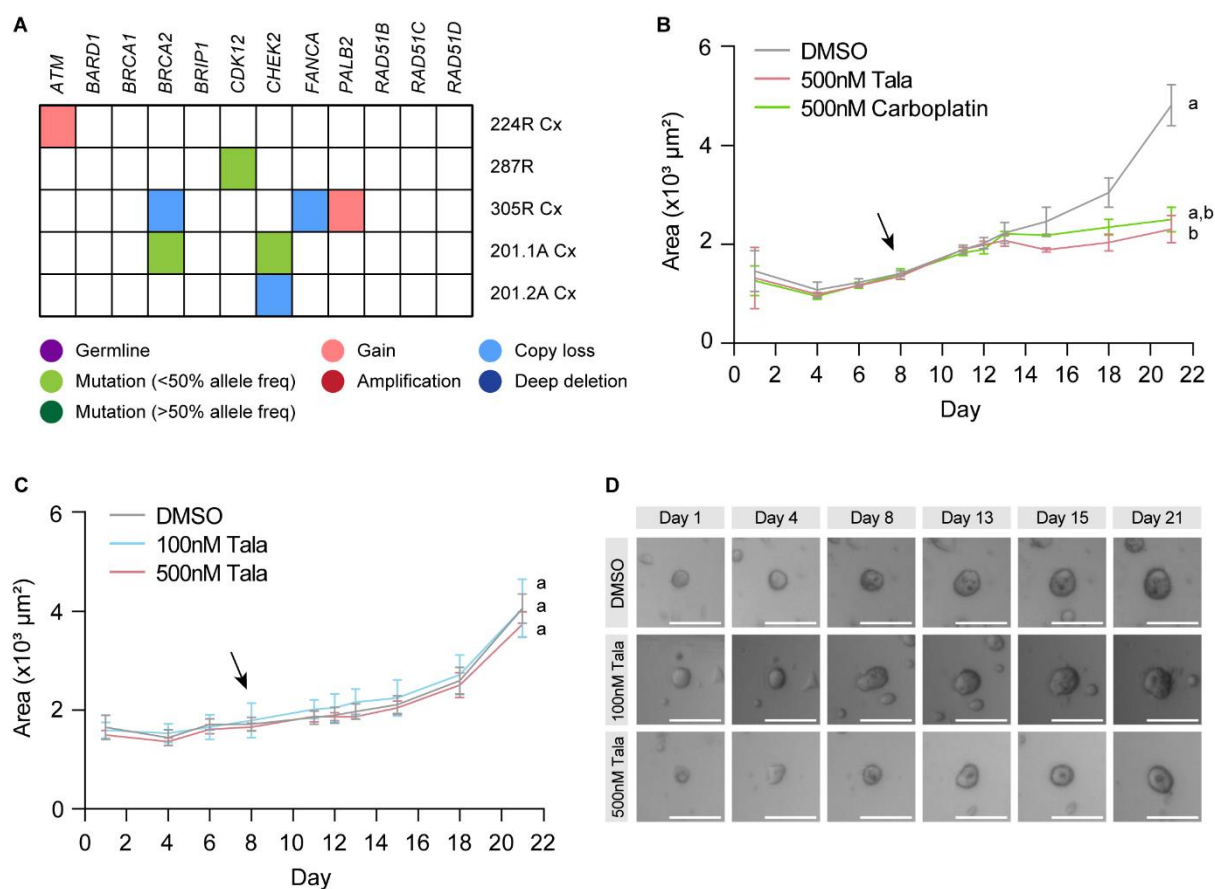

**Supplementary Figure 5: Alterations in DNA damage repair genes and change**

**in area over time in organoids after treatment. (A)** Plot summarising genomic

alterations in DNA damage repair genes based on targeted DNA sequencing of PDX

tissue. There are no homozygous mutations or deep deletions. **(B)** Graph showing the

mean area of 224R-Cx organoids grown for 21 days and treated with DMSO, 500 nM

talazoparib, or 500 nM carboplatin from day 8. Arrow indicates the first day of

treatment. **(C)** Graph showing the mean area of 287R organoids grown for 21 days

and treated with DMSO, 100 or 500nM talazoparib from day 8. Data are mean  $\pm$  SEM.

<sup>a</sup> $P < 0.001$ , statistical analysis of change in organoid area across time within each



treatment group; <sup>b</sup> $P < 0.001$ , statistical analysis of organoid area within each treatment group compared to vehicle control; two-way ANOVA with Dunnett's post hoc test. **(D)**

Representative images of 287R single organoids over time that were treated with DMSO, 100 or 500 nM talazoparib from day 8. Scale bars = 250  $\mu\text{m}$ . Abbreviations: CTG – CellTiter-Glo, Tala – talazoparib.

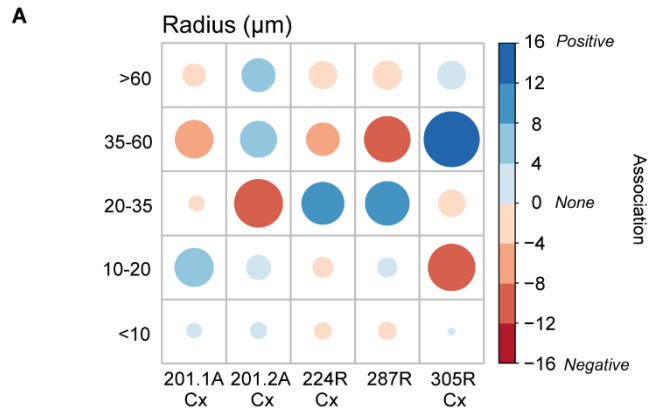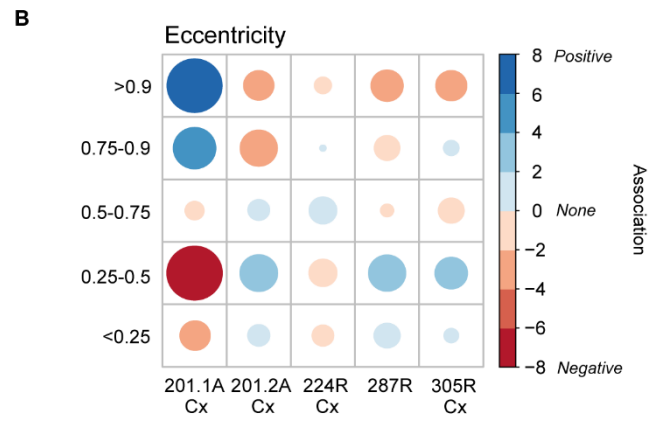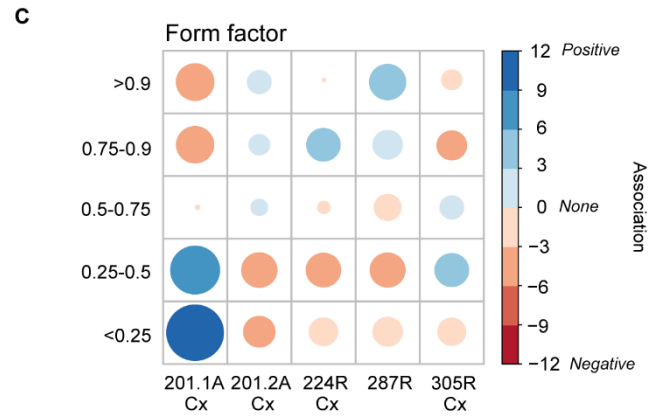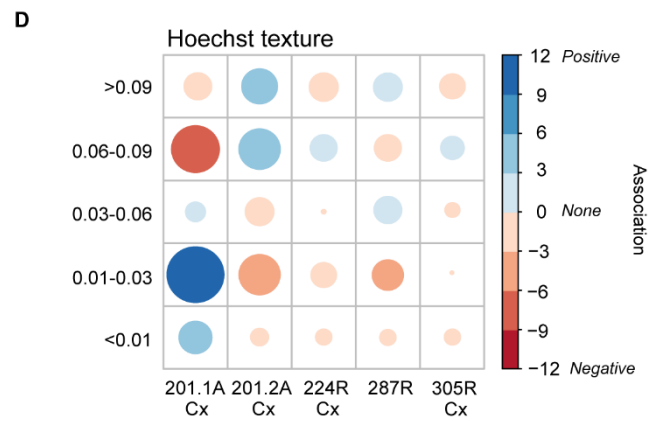

**Supplementary Figure 6: Schematic of Chi-squared analysis results for association between organoid models per bin.** The graphical matrices (A, B, C, D) represent Chi-squared tests of the association between organoid models (column) in each bin (row). Positive (blue) and negative (red) residuals specify the association between each organoid per bin. A positive association indicates a higher proportion of organoids in a bin, whereas a negative association indicates a lower proportion of organoids in a bin. The size of residuals (circles) is proportional to the magnitude of the association, positive or negative.
