# Supplementary material for: High-Throughput Imaging Assay for Drug Screening of 3D Prostate Cancer Organoids
Source: PubMed Central journal article supplement — SLAS Discov. 2021 Jun 11;26(9):1107–24. doi: 10.1177/24725552211020668 (PMC8458687; doi:10.1177/24725552211020668), 2021-06-11
Supplement: sj-pdf-2-jbx-10.1177_24725552211020668.pdf [file sj-pdf-2-jbx-10.1177_24725552211020668.pdf]

## **Supplemental Tables**

### **High-throughput imaging assay for drug screening of 3D prostate cancer organoids**

#### **Correspondence:**

Dr Mitchell G Lawrence  
Monash Biomedicine Discovery Institute Cancer Program, Department of Anatomy and  
Developmental Biology  
Monash University, Level 3, Building 76, 19 Innovation Walk, Clayton, VIC, 3800, Australia  
Phone: +61 3 9902 9286  
Email: mitchell.lawrence@monash.edu

A/Prof Kaylene Simpson  
Victorian Centre for Functional Genomics, Peter MacCallum Cancer Centre  
Level 11, Cluster 6, Victorian Comprehensive Cancer Centre, 305 Grattan St  
Melbourne, VIC, 3000, Australia  
Phone: +61 3 85597509  
Email: kaylene.simpson@petermac.org

**Supplementary Table 1:** Statistical analysis of organoid radius, area, and brightfield texture between the first and final day of the assay

| Measurements        | Matrigel concentration | Models    |           |         |      |         |
|---------------------|------------------------|-----------|-----------|---------|------|---------|
|                     |                        | 201.1A-Cx | 201.2A-Cx | 224R-Cx | 287R | 305R-Cx |
| Organoid radius     | 35%                    | ****      | ****      | ****    | **** | ****    |
|                     | 50%                    | ****      | ****      | ****    | **** | ****    |
|                     | 80%                    | ****      | ****      | ****    | **** | ****    |
| Organoid area       | 35%                    | ****      | ****      | ****    | **** | ****    |
|                     | 50%                    | ****      | ****      | ****    | **** | ****    |
|                     | 80%                    | ****      | ****      | ****    | **** | ****    |
| Brightfield texture | 35%                    | ****      | <i>ns</i> | ****    | **** | ****    |
|                     | 50%                    | ****      | ****      | ****    | **** | ****    |
|                     | 80%                    | ****      | ****      | ****    | **** | ****    |

Data relates to Figure 2E-G, I-K, Supplementary Figure 2D-F, H-J, L-N

Two-way ANOVA with Dunnett's post hoc test; \*\*\*\* $P < 0.0001$

*ns* = not significant

**Supplementary Table 2:** Statistical analysis of organoid radius, area, and brightfield texture between Matrigel concentrations

| Measurements        | Comparison of Matrigel concentrations | Models    |           |           |           |           |
|---------------------|---------------------------------------|-----------|-----------|-----------|-----------|-----------|
|                     |                                       | 201.1A-Cx | 201.2A-Cx | 224R-Cx   | 287R      | 305R-Cx   |
| Organoid radius     | 35% vs. 50%                           | ****      | <i>ns</i> | ****      | *         | ****      |
|                     | 35% vs. 80%                           | ****      | <i>ns</i> | ****      | ****      | ****      |
|                     | 50% vs. 80%                           | ****      | *         | ****      | **        | **        |
| Organoid area       | 35% vs. 50%                           | ****      | <i>ns</i> | ****      | <i>ns</i> | ****      |
|                     | 35% vs. 80%                           | ****      | <i>ns</i> | ****      | ****      | ****      |
|                     | 50% vs. 80%                           | ****      | **        | ****      | <i>ns</i> | ****      |
| Brightfield texture | 35% vs. 50%                           | <i>ns</i> | ***       | <i>ns</i> | *         | ****      |
|                     | 35% vs. 80%                           | <i>ns</i> | ****      | <i>ns</i> | <i>ns</i> | ****      |
|                     | 50% vs. 80%                           | **        | <i>ns</i> | <i>ns</i> | <i>ns</i> | <i>ns</i> |

Data relates to Figure 2E-G, I-K, Supplementary Figure 2D-F, H-J, L-N

Two-way ANOVA with Tukey's post hoc test; \* $P < 0.05$ , \*\* $P < 0.01$ , \*\*\* $P < 0.001$ , \*\*\*\* $P < 0.0001$

*ns* = not significant

**Supplementary Table 3:** Statistical analysis of organoid readouts at all talazoparib doses relative to DMSO controls

| Readout                  | Talazoparib dose (nM) | Models    |           |           |           |           |
|--------------------------|-----------------------|-----------|-----------|-----------|-----------|-----------|
|                          |                       | 201.1A-Cx | 201.2A-Cx | 224R-Cx   | 287R      | 305R-Cx   |
| CTG                      | 10                    | <i>ns</i> | <i>ns</i> | *         | <i>ns</i> | <i>ns</i> |
|                          | 50                    | <i>ns</i> | <i>ns</i> | **        | <i>ns</i> | <i>ns</i> |
|                          | 100                   | <i>ns</i> | <i>ns</i> | **        | <i>ns</i> | <i>ns</i> |
|                          | 500                   | *         | <i>ns</i> | ***       | <i>ns</i> | **        |
| Radius                   | 10                    | <i>ns</i> | <i>ns</i> | **        | <i>ns</i> | <i>ns</i> |
|                          | 50                    | <i>ns</i> | <i>ns</i> | <i>ns</i> | <i>ns</i> | <i>ns</i> |
|                          | 100                   | <i>ns</i> | <i>ns</i> | ***       | <i>ns</i> | <i>ns</i> |
|                          | 500                   | <i>ns</i> | <i>ns</i> | ***       | <i>ns</i> | <i>ns</i> |
| Area                     | 10                    | <i>ns</i> | <i>ns</i> | **        | <i>ns</i> | <i>ns</i> |
|                          | 50                    | <i>ns</i> | <i>ns</i> | <i>ns</i> | <i>ns</i> | <i>ns</i> |
|                          | 100                   | <i>ns</i> | <i>ns</i> | **        | <i>ns</i> | <i>ns</i> |
|                          | 500                   | <i>ns</i> | <i>ns</i> | **        | <i>ns</i> | <i>ns</i> |
| Hoechst intensity        | 10                    | *         | <i>ns</i> | *         | <i>ns</i> | <i>ns</i> |
|                          | 50                    | <i>ns</i> | <i>ns</i> | *         | <i>ns</i> | <i>ns</i> |
|                          | 100                   | *         | <i>ns</i> | **        | <i>ns</i> | <i>ns</i> |
|                          | 500                   | ***       | <i>ns</i> | **        | <i>ns</i> | *         |
| Hoechst texture          | 10                    | *         | <i>ns</i> | **        | <i>ns</i> | <i>ns</i> |
|                          | 50                    | <i>ns</i> | <i>ns</i> | **        | <i>ns</i> | <i>ns</i> |
|                          | 100                   | *         | <i>ns</i> | ***       | **        | <i>ns</i> |
|                          | 500                   | ***       | <i>ns</i> | ***       | *         | *         |
| Hoechst texture variance | 10                    | <i>ns</i> | <i>ns</i> | **        | <i>ns</i> | <i>ns</i> |
|                          | 50                    | <i>ns</i> | <i>ns</i> | **        | <i>ns</i> | <i>ns</i> |
|                          | 100                   | <i>ns</i> | <i>ns</i> | ***       | ***       | <i>ns</i> |
|                          | 500                   | *         | <i>ns</i> | ***       | **        | *         |

Data relates to Figure 3D-H

Two-way mixed ANOVA with Dunnett's post hoc test; \* $P < 0.05$ , \*\* $P < 0.01$ , \*\*\* $P < 0.001$

*ns* = not significant
